# Supplementary material for: Mapping of QTLs Associated with Yield and Yield Related Traits in Durum Wheat (Triticum durum Desf.) Under Irrigated and Drought Conditions
Source: PubMed Central journal article supplement (PMC7177892; doi:10.3390/ijms21072372), 2020-03-30
Supplement: ijms-21-02372-s001.pdf [file ijms-21-02372-s001.pdf]

**Article title: Mapping of QTLs associated with yield and yield related traits in durum wheat (*Triticum durum* Desf.) under irrigated and drought conditions**  
**Journal Name: International Journal of Molecular Sciences**

*Mian Abdur Rehman Arif<sup>1</sup>\*, Fauzia Attaria<sup>1</sup>, Sajid Shokat<sup>1</sup>, Saba Akram<sup>1</sup>, Muhammad Qandeel Waheed<sup>1</sup>, Anjuman Arif<sup>1</sup>, Andreas Börner<sup>2</sup>*

<sup>1</sup>Nuclear Institute for Agriculture and Biology, Jhang Road, Faisalabad, Pakistan

<sup>2</sup>Leibniz Institute of Plant Genetics and Crop Plant Research, Corrensstr. 3, 06466 Seeland OT, Gatersleben, Germany

\*Corresponding author (Email, [m.a.rehman.arif@gmail.com](mailto:m.a.rehman.arif@gmail.com))

**Table S1** Correlations among Gr, Hd and Ph under various conditions and seasons, \*: correlation significant at *p value* 0.05 and \*\*: correlation significant at *p value* 0.01

|        | Gr_S1   | GrD_S1 | Gr_S2 | GrD_S2 | Hd_S1   | HdD_S1 | Hd_S2 | HdD_S2  | Ph_S1  | PhD_S1 | Ph_S2  | PhD_S2 |
|--------|---------|--------|-------|--------|---------|--------|-------|---------|--------|--------|--------|--------|
| Gr_S1  | 1       |        |       |        |         |        |       |         |        |        |        |        |
| GrD_S1 | 0.63**  | 1      |       |        |         |        |       |         |        |        |        |        |
| Gr_S2  |         |        | 1     |        |         |        |       |         |        |        |        |        |
| GrD_S2 |         | 0.21** | 0.44  | 1      |         |        |       |         |        |        |        |        |
| TT_S1  |         |        |       |        |         |        |       |         |        |        |        |        |
| TT_S2  |         |        |       |        |         |        |       |         |        |        |        |        |
| Hd_S1  | 0.23**  | 0.21** |       |        | 1       |        |       |         |        |        |        |        |
| HdD_S1 |         |        |       |        | 0.94**  | 1      |       |         |        |        |        |        |
| Hd_S2  |         | 0.21** |       |        | 0.8**   | 0.78** | 1     |         |        |        |        |        |
| HdD_S2 |         |        | 0.21* |        | 0.73**  | 0.78** | 0.9** | 1       |        |        |        |        |
| Ph_S1  |         | -0.3** |       |        | -0.23** |        |       | -0.21** | 1      |        |        |        |
| PhD_S1 | -0.21** | -0.19* |       | 0.24*  |         |        |       |         | 0.8**  | 1      |        |        |
| Ph_S2  |         | -0.19* |       |        |         |        |       | -0.2*   | 0.73** | 0.68** | 1      |        |
| PhD_S2 |         |        |       |        |         |        |       |         | 0.71** | 0.65** | 0.89** | 1      |

**Table S2** Correlations among Tr, Sc, Phr and Wue under various conditions and seasons, \*: correlation significant at *p value* 0.05 and \*\*: correlation significant at *p value* 0.01

|         | Tr_S1  | TrD_S1 | Tr_S2  | TrD_S2 | Sc_S1  | ScD_S1 | Sc_S2  | ScD_S2 | Phr_S1 | PhrD_S1 | Phr_S2 | PhrD_S2 | Wue_S1  | WueD_S1 | Wue_S2 | WueD_S2 |
|---------|--------|--------|--------|--------|--------|--------|--------|--------|--------|---------|--------|---------|---------|---------|--------|---------|
| Tr_S1   | 1      |        |        |        |        |        |        |        |        |         |        |         |         |         |        |         |
| TrD_S1  | 0.21** | 1      |        |        |        |        |        |        |        |         |        |         |         |         |        |         |
| Tr_S2   | 0.54** | -      | 1      |        |        |        |        |        |        |         |        |         |         |         |        |         |
| TrD_S2  |        |        | 0.25** | 1      |        |        |        |        |        |         |        |         |         |         |        |         |
| Sc_S1   | 0.5**  |        | 0.27** |        | 1      |        |        |        |        |         |        |         |         |         |        |         |
| ScD_S1  | 0.2*   | 0.85** | 0.39** |        |        | 1      |        |        |        |         |        |         |         |         |        |         |
| Sc_S2   |        |        |        | -      | 0.28** | 0.38** | 1      |        |        |         |        |         |         |         |        |         |
| ScD_S2  |        | 0.54** | 0.39** |        | -      | 0.21** | 0.66** | 0.47** | 1      |         |        |         |         |         |        |         |
| Phr_S1  |        |        |        |        | 0.84** |        | 0.35** |        | 1      |         |        |         |         |         |        |         |
| PhrD_S1 |        |        |        |        |        | 0.36** |        | 0.26** |        | 1       |        |         |         |         |        |         |
| Phr_S2  | -      | 0.23** | 0.25** | 0.53** | 0.38** |        | 0.33** | 0.79** | 0.61** | 0.28**  | 0.21** | 1       |         |         |        |         |
| PhrD_S2 |        | 0.48** | 0.44** | -0.4** |        | 0.61** | 0.5**  | 0.96** |        | 0.3**   | 0.68** | 1       |         |         |        |         |
| Wue_S1  | -      | 0.29** |        | -      | 0.52** | 0.21** | 0.56** |        | 0.27** |         | 0.5**  |         | 1       |         |        |         |
| WueD_S1 |        | -      | 0.75** |        |        |        |        | -      | 0.27** |         | 0.65** |         | -0.21** | 1       |        |         |
| Wue_S2  | -      | 0.37** | 0.3**  | 0.75** | 0.37** |        | 0.37** | 0.52** | 0.57** |         | 0.93** | 0.65**  | 0.53**  |         | 1      |         |
| WueD_S2 |        | 0.39** | 0.44** | -      | 0.58** |        | 0.54** | 0.5**  | 0.86** |         | 0.33** | 0.69**  | 0.97**  |         | 0.67** | 1       |

**Table S3** Correlations among SI, Sw, Sps and Tkw under various conditions and seasons, \*: correlation significant at *p value* 0.05 and \*\*: correlation significant at *p value* 0.01

|         | SI_S1  | SID_S1 | SI_S2  | SID_S2      | Sw_S1  | SwD_S1 | Sw_S2  | SwD_S2 | Sps_S1 | SpsD_S1 | Sps_S2 | SpsD_S2 | Tkw_S1 | TkwD_S1 | Tkw_S2 | TkwD_S2 |
|---------|--------|--------|--------|-------------|--------|--------|--------|--------|--------|---------|--------|---------|--------|---------|--------|---------|
| SI_S1   | 1      |        |        |             |        |        |        |        |        |         |        |         |        |         |        |         |
| SID_S1  | 0.47** | 1      |        |             |        |        |        |        |        |         |        |         |        |         |        |         |
| SI_S2   |        | 0.3**  | 1      |             |        |        |        |        |        |         |        |         |        |         |        |         |
| SID_S2  |        | 0.26** | 0.67** | 1           |        |        |        |        |        |         |        |         |        |         |        |         |
| Sw_S1   | 0.25** |        |        |             | 1      |        |        |        |        |         |        |         |        |         |        |         |
| SwD_S1  | 0.27** | 0.33** |        |             | 0.6**  | 1      |        |        |        |         |        |         |        |         |        |         |
| Sw_S2   | 0.27** |        | 0.25** |             |        |        | 1      |        |        |         |        |         |        |         |        |         |
| SwD_S2  |        |        |        | 0.22**      |        | 0.27** | 0.57** | 1      |        |         |        |         |        |         |        |         |
| Sps_S1  |        |        |        |             | 0.68** | 0.57** |        |        | 1      |         |        |         |        |         |        |         |
| SpsD_S1 | 0.29** | 0.3**  |        |             | 0.54** | 0.9**  |        | 0.28** | 0.63** | 1       |        |         |        |         |        |         |
| Sps_S2  |        |        |        |             |        |        | 0.57** | 0.37** |        |         | 1      |         |        |         |        |         |
| SpsD_S2 |        |        |        | 0.23**      |        |        | 0.34** | 0.74** |        |         | 0.36** | 1       |        |         |        |         |
| Tkw_S1  |        |        |        | -<br>0.22** | 0.36** | 0.25** | 0.22** | 0.29** | 0.26** |         |        |         | 1      |         |        |         |
| TkwD_S1 |        |        |        | 0.21**      | 0.26** | 0.3**  | 0.23** | 0.31** | 0.22** |         |        |         | 0.8**  | 1       |        |         |
| Tkw_S2  |        |        |        | -<br>0.22** | 0.25** | 0.25** | 0.58** | 0.66** | 0.24** |         | 0.2*   | 0.29**  | 0.41   | 0.36**  | 1      |         |
| TkwD_S2 |        |        |        |             | 0.21** | 0.23** | 0.53** | 0.73** | 0.26** |         | 0.31** | 0.43**  | 0.47** | 0.9**   | 1      |         |

**Table S4** Correlations among Bm, Yd and HI under various conditions and seasons, \*: correlation significant at *p value* 0.05 and \*\*: correlation significant at *p value* 0.01

|        | Bm_S1   | BmD_S1  | Bm_S2   | BmD_S2 | Yd_S1  | YdD_S1 | Yd_S2  | YdD_S2 | HI_S1  | HID_S1 | HI_S2 | HID_S2 |
|--------|---------|---------|---------|--------|--------|--------|--------|--------|--------|--------|-------|--------|
| Bm_S1  | 1       |         |         |        |        |        |        |        |        |        |       |        |
| BmD_S1 | 0.44**  | 1       |         |        |        |        |        |        |        |        |       |        |
| Bm_S2  | 0.58**  |         | 1       |        |        |        |        |        |        |        |       |        |
| BmD_S2 |         | 0.22**  | 0.32**  | 1      |        |        |        |        |        |        |       |        |
| Yd_S1  | 0.63**  | 0.3**   | 0.33**  |        | 1      |        |        |        |        |        |       |        |
| YdD_S1 | 0.29**  | 0.69**  |         |        | 0.49** | 1      |        |        |        |        |       |        |
| Yd_S2  | 0.43**  |         | 0.74**  | 0.32** | 0.63** |        | 1      |        |        |        |       |        |
| YdD_S2 |         | 0.32**  | 0.25**  | 0.74** | 0.3**  | 0.5**  | 0.44** | 1      |        |        |       |        |
| HI_S1  | -0.2*   |         | -0.28** |        | 0.5**  | 0.35** |        |        | 1      |        |       |        |
| HID_S1 | -0.24** | -0.38** | -0.2*   |        |        | 0.34** |        | 0.22*  | 0.4**  | 1      |       |        |
| HI_S2  |         |         |         |        | 0.46** |        | 0.5**  | 0.32** | 0.64** | 0.44** | 1     |        |
| HID_S2 |         |         |         | -0.3** | 0.24** | 0.49** |        | 0.37** | 0.21** | 0.44** | 0.3** | 1      |

**Table S5** Correlations among STI, MP, STI, SSI and DRI in two seasons, \*: correlation significant at *p value* 0.05 and \*\*: correlation significant at *p value* 0.01

|        | STI_S1 | STI_S2 | MP_S1  | MP_S2  | ST_S1  | ST_S2   | SSI_S1  | SSI_S2  | DRI_S1 | DRI_S2 |
|--------|--------|--------|--------|--------|--------|---------|---------|---------|--------|--------|
| STI_S1 | 1      |        |        |        |        |         |         |         |        |        |
| STI_S2 | 0.55** | 1      |        |        |        |         |         |         |        |        |
| MP_S1  | 0.95** | 0.56** | 1      |        |        |         |         |         |        |        |
| MP_S2  | 0.51** | 0.91** | 0.59** | 1      |        |         |         |         |        |        |
| ST_S1  | 0.67** | 0.5**  | 0.87** | 0.63** | 1      |         |         |         |        |        |
| ST_S2  | 0.31** | 0.54** | 0.49** | 0.83** | 0.68** | 1       |         |         |        |        |
| SSI_S1 | 0.2*   | 0.31** | 0.45*  | 0.54** | 0.8**  | 0.75**  | 1       |         |        |        |
| SSI_S2 |        |        | 0.26*  | 0.34** | 0.54** | 0.78**  | 0.76**  | 1       |        |        |
| DRI_S1 | 0.31** |        |        | -0.21* | -0.4** | -0.49** | -0.81** | -0.63** | 1      |        |
| DRI_S2 | 0.27*  | 0.55** |        | 0.26** |        | -0.32** | -0.39** | -0.77** | 0.48** | 1      |

**Table S6** Rainfall data of the two seasons of the study

|              | 2016-17 (S1) |      | 2017-18 (S2) |      |
|--------------|--------------|------|--------------|------|
|              | Amount in mm | Days | Amount in mm | Days |
| <b>Nov</b>   | 0            | 0    | 0.44         | 0    |
| <b>Dec</b>   | 0            | 0    | 0.06         | 0    |
| <b>Jan</b>   | 11.14        | 5    | 0            | 0    |
| <b>Feb</b>   | 1.22         | 1    | 7.25         | 3    |
| <b>March</b> | 4.71         | 2    | 10.56        | 7    |
| <b>April</b> | 16.58        | 4    | 12.21        | 15   |
| <b>May</b>   | 2.6          | 2    | 11.96        | 5    |
| <b>Total</b> | 36.25        | 14   | 42.48        | 30   |

**Table S7** Temperature data of the two seasons of the study in °C

|             | 2016-17 (S1) |       |       | 2017-18 (S2) |      |      |
|-------------|--------------|-------|-------|--------------|------|------|
|             | Min.         | Max.  | Mean  | Min.         | Max. | Mean |
| Nov         | 16           | 31    | 22    | 17           | 19   | 22   |
| Dec         | 12           | 27    | 18    | 13           | 24   | 17   |
| Jan         | 9            | 21    | 13    | 10           | 25   | 15   |
| Feb         | 11           | 27    | 18    | 13           | 26   | 18   |
| March       | 14           | 31    | 22    | 17           | 32   | 24   |
| April       | 23           | 39    | 31    | 23           | 36   | 29   |
| May         | 29           | 42    | 36    | 30           | 41   | 36   |
| <b>Mean</b> | 16.28        | 31.14 | 22.85 | 17.57        | 29   | 23   |

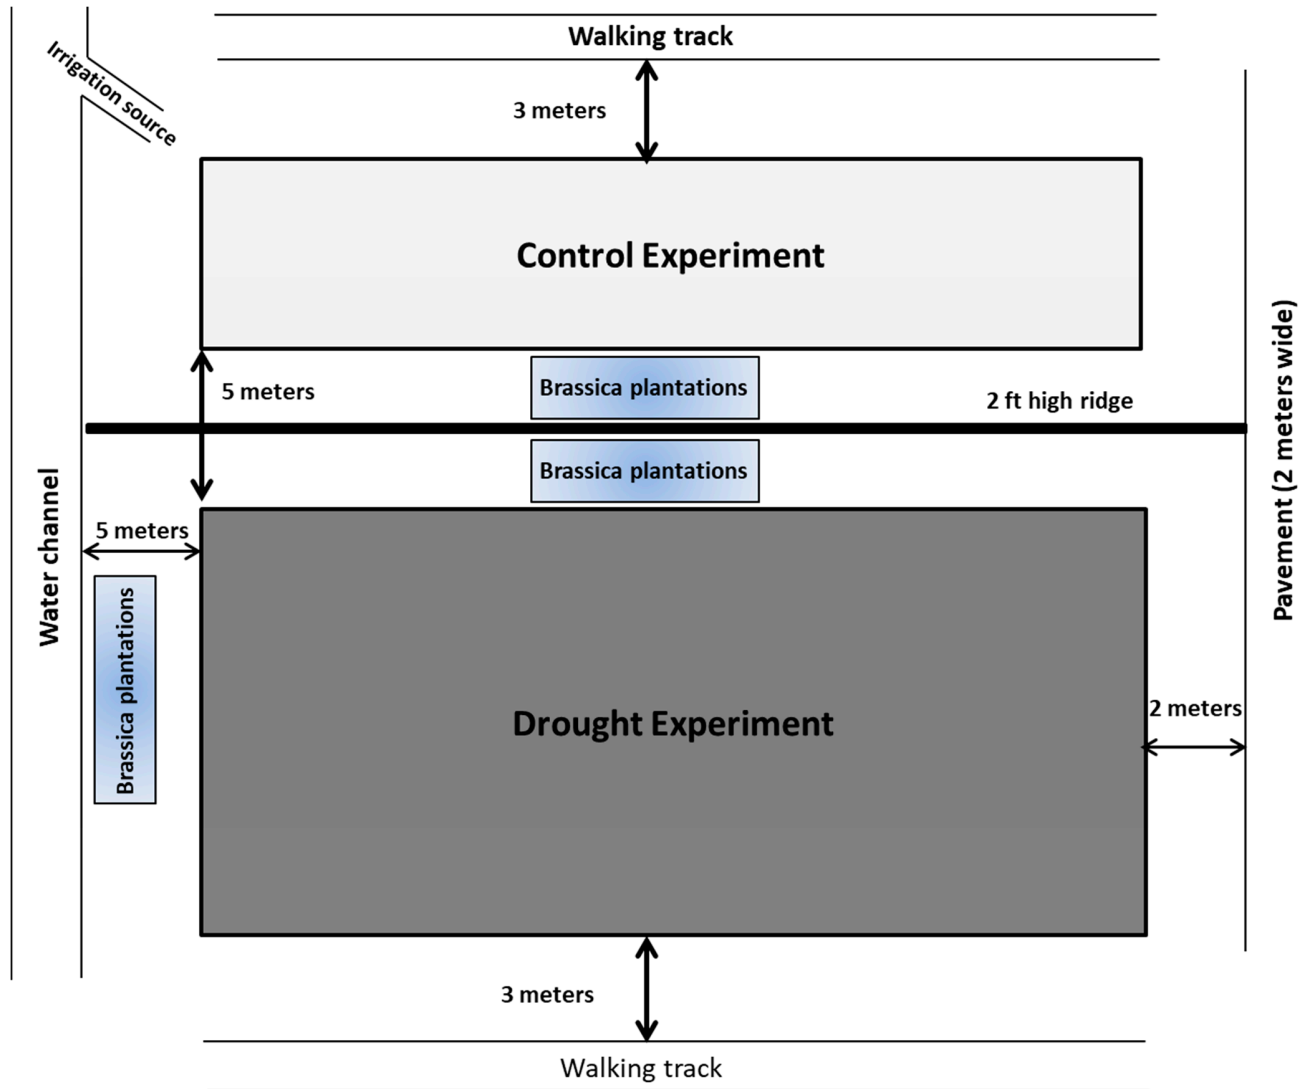

**Fig S1** Layout of the experiments in S1 and S2
